# Supplementary material for: A redox-mediated 3D graphene based nanoscoop design for ultracapacitor applications
Source: Royal Society of Chemistry journal article supplement (doi:10.1039/c7nj01461a), 2017-01-01
Supplement: c7nj01461a1.pdf [file c7nj01461a1.pdf]

## Electronic Supplementary Information for

### Redox-Mediated 3D Graphene based nanoscoop design for Ultracapacitor Applications

Pallavi Rani, Suman Kumari Jhajharia, Kaliaperumal Selvaraj\*

Nano and Computational Materials Lab., Catalysis Division, CSIR-National Chemical Laboratory,  
Pune- 411008, India

Phone (off.): +91-20-25 90 22 62, (Lab.): +91-20-25 90 22 79, Fax (off.): +91-20-25-90 26 33

E-mail: [k.selvaraj@ncl.res.in](mailto:k.selvaraj@ncl.res.in); [kselva@gmail.com](mailto:kselva@gmail.com)

### Contents

|                                   |       |
|-----------------------------------|-------|
| 1. Supplementary Figures.....     | S1-S7 |
| 2. Supplementary Table.....       | S8    |
| 3. Supplementary References ..... | S9    |

### Supplementary Figures

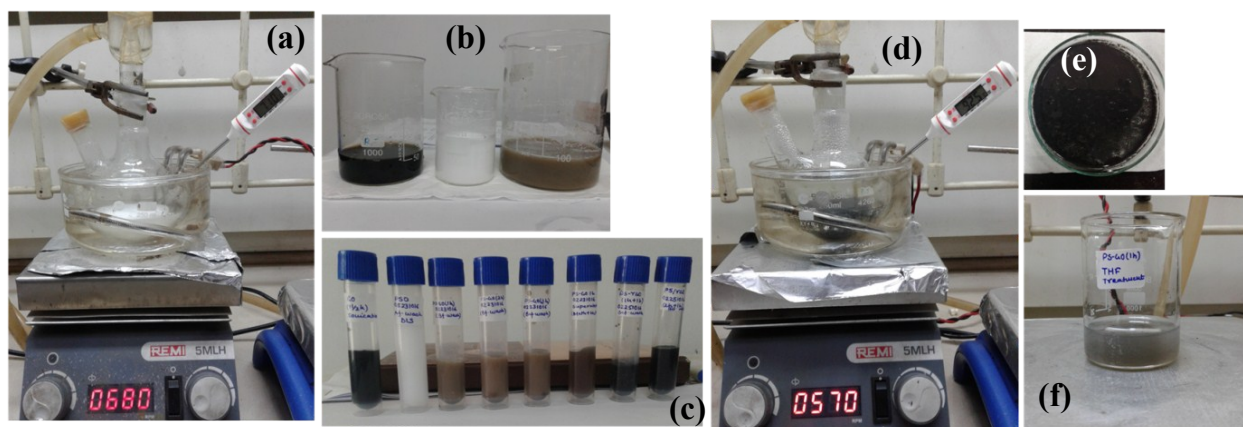

Fig. S1: Photos of setup for synthesis of polystyrene beads (a) GO suspension and PS colloidal solution (b) sample vial with PS-GO and PS-rGO solution with different reaction time (c) synthesis of PS-rGO composites (d) obtained PS-rGO powder product (e) treatment of PS-rGO powder with THF

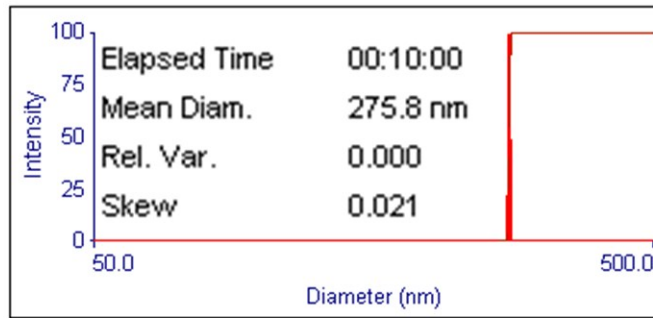

Multimodal Size Distribution

| d(nm) | G(d) | C(d) | d(nm) | G(d) | C(d) | d(nm) | G(d) | C(d) |
|-------|------|------|-------|------|------|-------|------|------|
| 266.7 | 0    | 0    | 276.4 | 88   | 82   | 286.4 | 0    | 100  |
| 267.6 | 0    | 0    | 277.3 | 49   | 97   | 287.3 | 0    | 100  |
| 268.5 | 0    | 0    | 278.2 | 9    | 100  | 288.2 | 0    | 100  |
| 269.3 | 0    | 0    | 279.1 | 0    | 100  | 289.2 | 0    | 100  |
| 270.2 | 0    | 0    | 280.0 | 0    | 100  | 290.1 | 0    | 100  |
| 271.1 | 0    | 0    | 280.9 | 0    | 100  | 291.0 | 0    | 100  |
| 272.0 | 0    | 0    | 281.8 | 0    | 100  | 292.0 | 0    | 100  |
| 272.8 | 0    | 0    | 282.7 | 0    | 100  | 292.9 | 0    | 100  |
| 273.7 | 21   | 6    | 283.6 | 0    | 100  | 293.9 | 0    | 100  |
| 274.6 | 61   | 25   | 284.5 | 0    | 100  | 294.8 | 0    | 100  |
| 275.5 | 100  | 55   | 285.5 | 0    | 100  | 295.8 | 0    | 100  |

Fig. S2: Z-average particle size of polystyrene beads

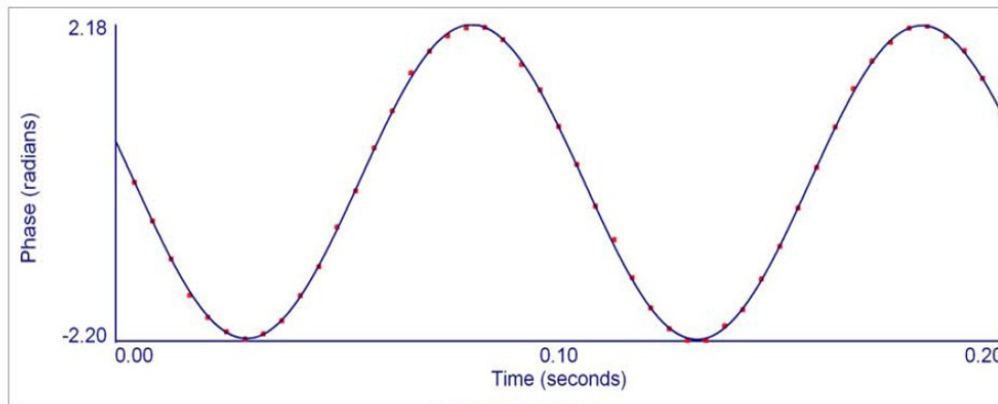

ps 04 (Combined)

| Run        | Mobility | Zeta Potential (mV) | Rel. Residual |
|------------|----------|---------------------|---------------|
| 1          | -3.00    | -56.86              | 0.0123        |
| 2          | -3.05    | -57.79              | 0.0137        |
| 3          | -2.97    | -56.41              | 0.0126        |
| 4          | -3.05    | -57.91              | 0.0140        |
| 5          | -2.96    | -56.23              | 0.0127        |
| 6          | -3.03    | -57.43              | 0.0125        |
| 7          | -2.99    | -56.62              | 0.0144        |
| 8          | -3.01    | -57.05              | 0.0137        |
| 9          | -2.97    | -56.38              | 0.0115        |
| 10         | -3.03    | -57.53              | 0.0114        |
| Mean       | -3.01    | -57.02              | 0.0129        |
| Std. Error | 0.01     | 0.19                | 0.0003        |
| Combined   | -3.01    | -57.02              | 0.0036        |

Fig. S3: Zeta potential measurement of polystyrene colloidal particle (PS)

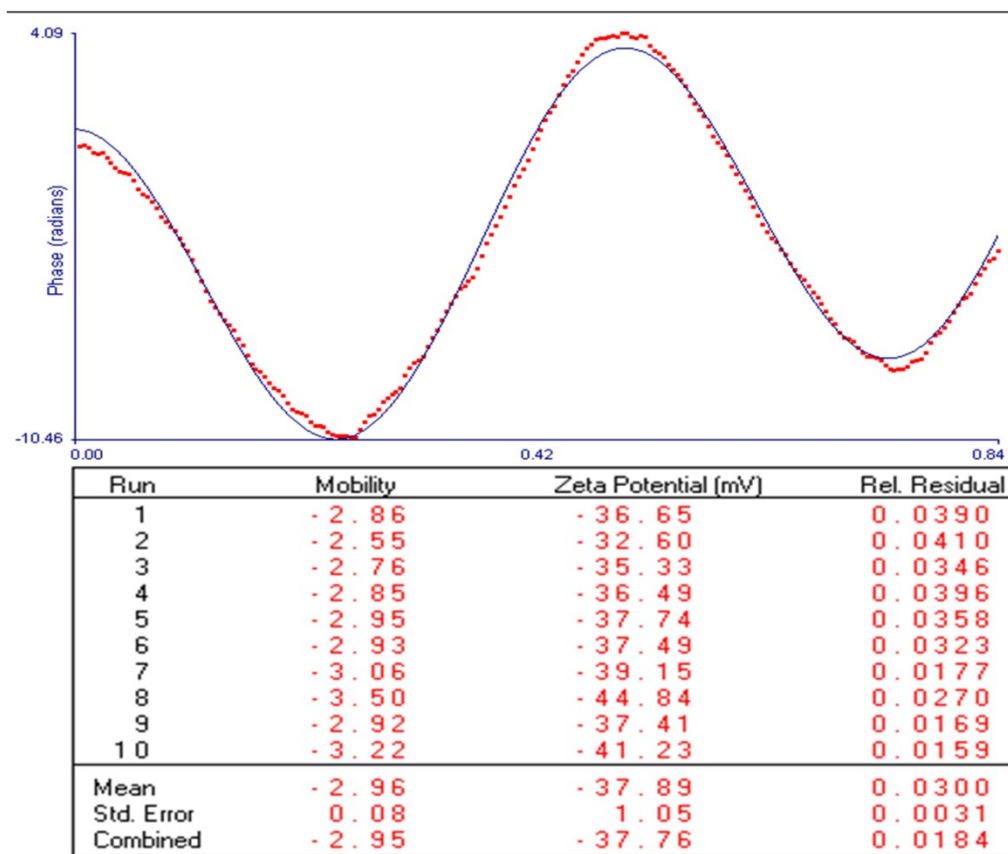

Fig. S4: Zeta potential measurement of Graphene oxide (GO)

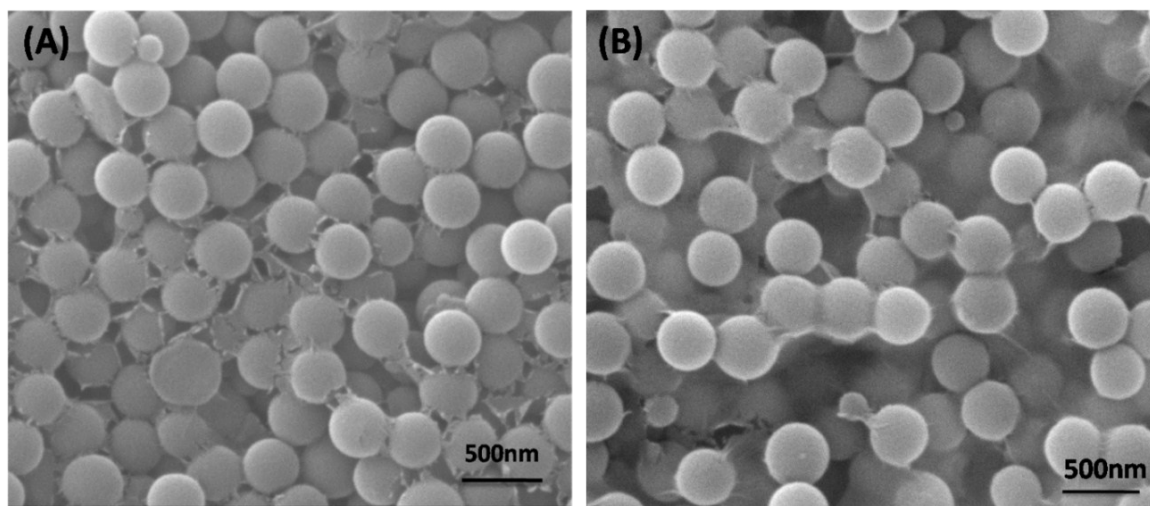

Fig. S5: SEM images of displaying PS-GO interaction in (A) 1h (B) 2h

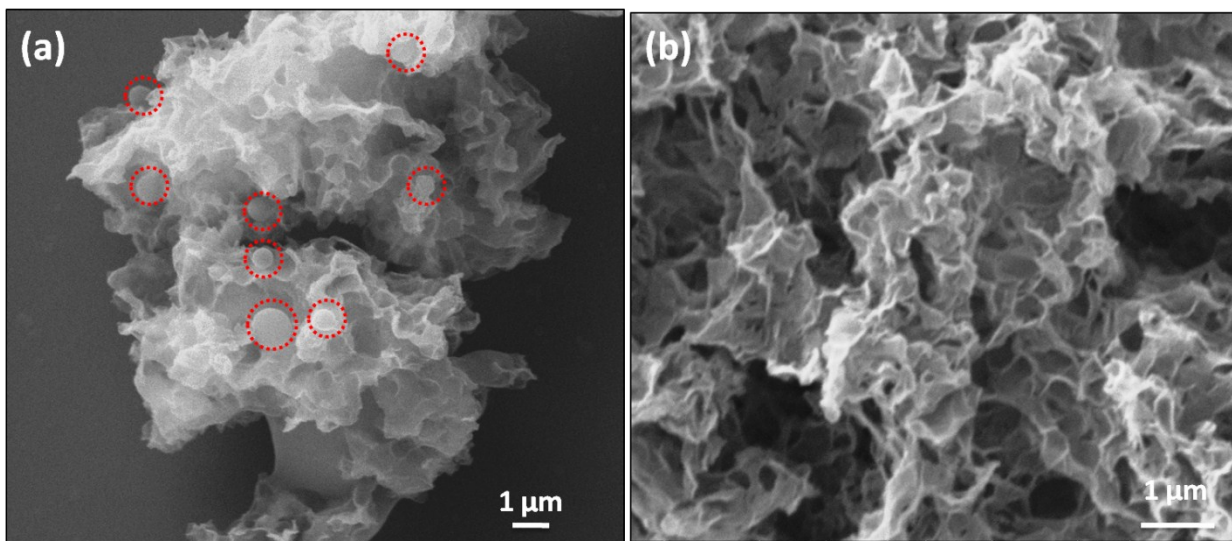

Fig. S6: SEM image of 3D graphene nanoscoop prepared after (a) THF treatment and (b) thermal treatment

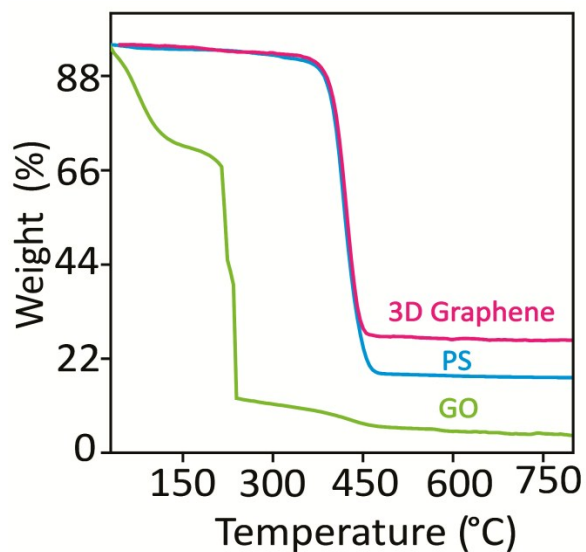

Fig.S7: TG of GO, PS and 3D Graphene.

As shown in Fig.S6, TG curve of GO shows significant weight losing events. The first event at around 110°C is related to the absorbed water while the second significant loss around 250°C is attributed to the decomposition of oxygen-containing functional group, yielding CO, CO<sub>2</sub> and steam. The PS spheres start losing weight at 350°C and were burned completely at around 450°C. However, as expected, the PS and graphene shell began to decompose significantly at a temperature of about 450°C. Therefore, to retained spherical shell, heat treatment at a temperature of 420°C under heating condition (air, heating rate 5°C per min, held at 420°C for 2 h) was required.

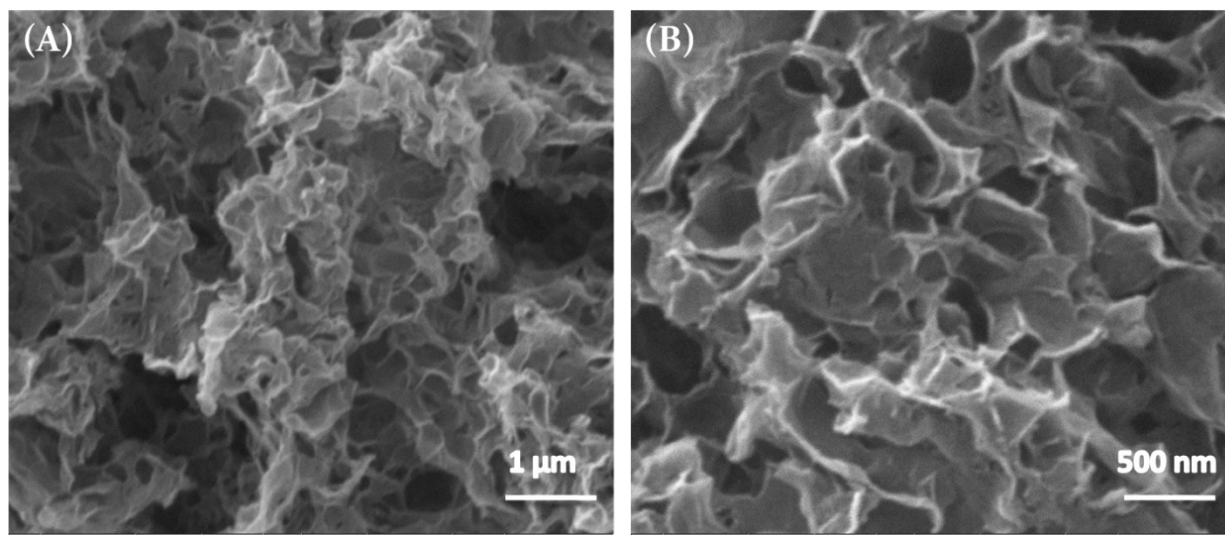

Fig. S8: SEM image of 3D graphene showing the effect of increasing heat rate with curvature during thermal treatment (A) 5 °C/min (B) 30 °C/min

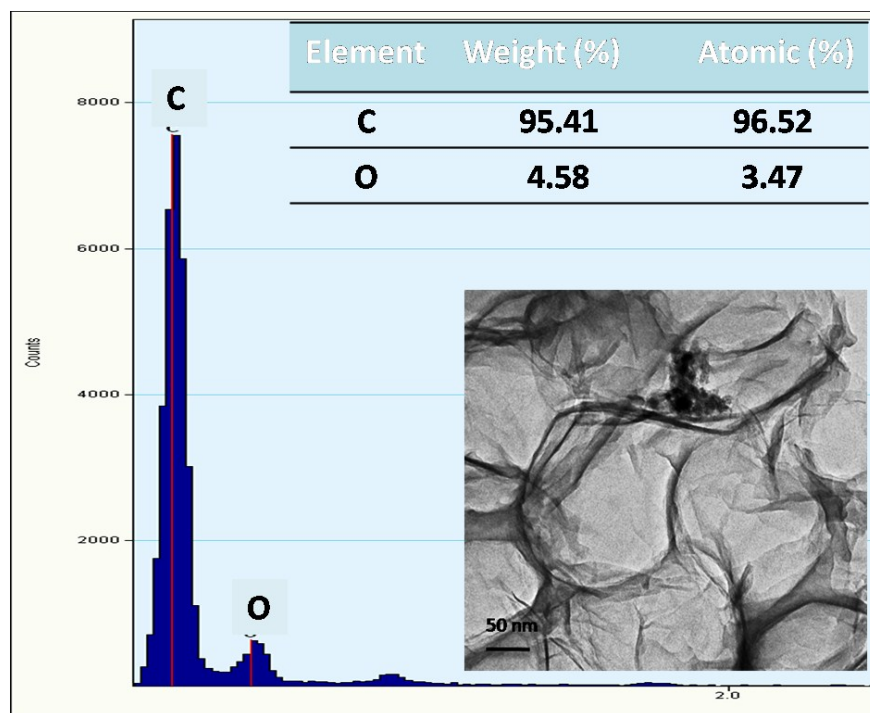

Fig. S9: EDS Spectra of 3D graphene representing atomic percentage of elements present

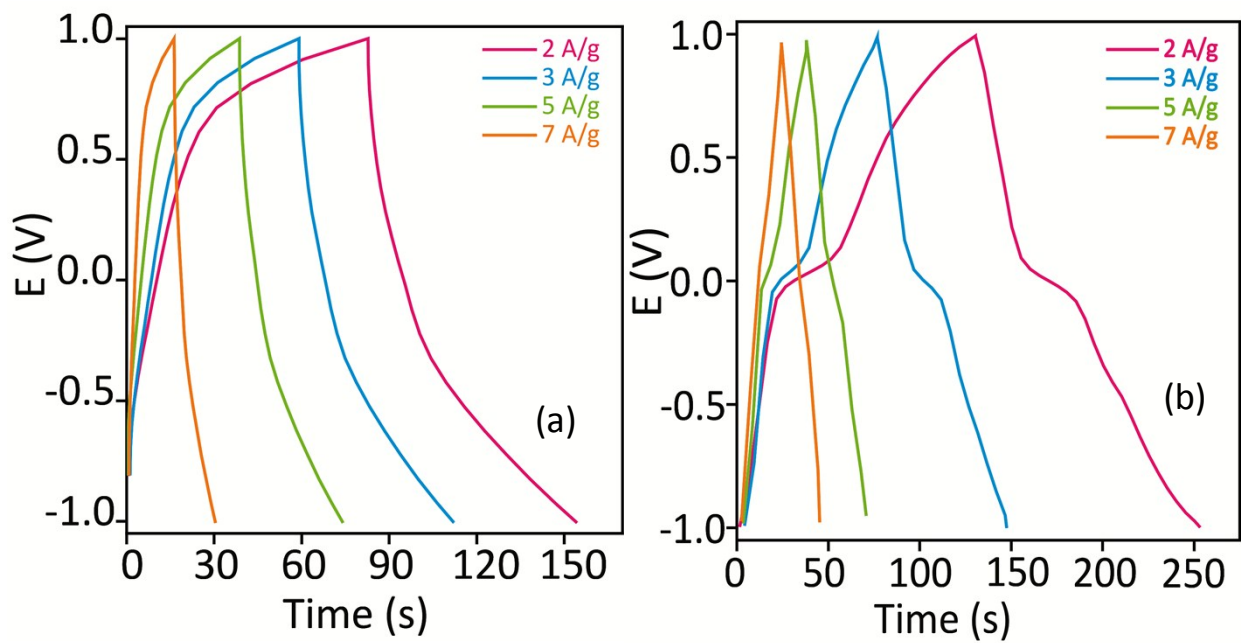

Fig. S10: Charge-discharge curve of rGO at different current densities in (a) 1M KOH (b) 1M KOH + 0.08 M  $K_3Fe(CN)_6$  electrolytes

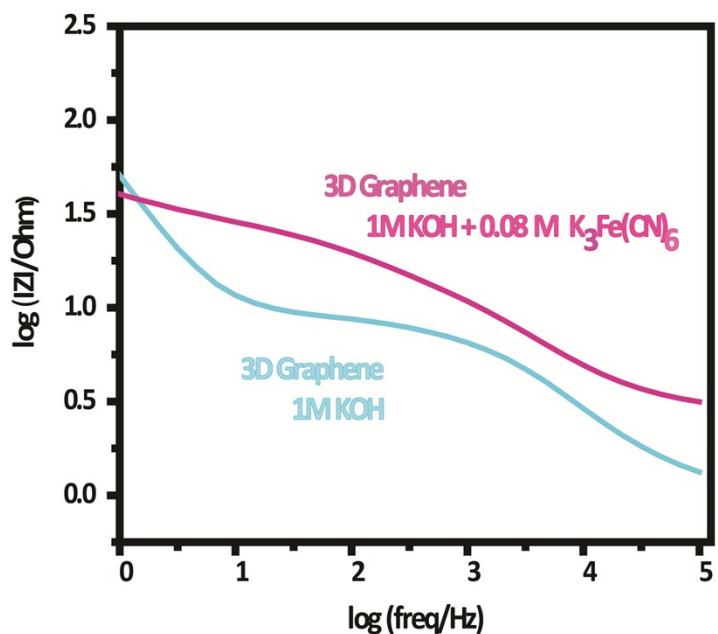

Fig. S11: Bode Plot of 3D Graphene in 1M KOH and 1M KOH+ 0.08M K<sub>3</sub>Fe(CN)<sub>6</sub>

As shown in Fig S10, Bode plot of 3D graphene in different electrolyte system. Bode plot automatically reflects the system dynamics with respect to the frequency. Bode plot shows that irrespective of the frequency the modulus ( $|Z|$ ) is always higher for the redox mediated 3D graphene than that of 3D graphene. The difference in  $|Z|$  between these two systems at any given frequency implies that it is the actual contribution of the redox system towards the total impedance and that it is largely an imaginary component of impedance.

## Supplementary Table

Table S1. Performance of various carbon based electrode and redox electrolyte systems.

| Electrode material        | Redox additive electrolyte                         | Specific capacitance(F/g)       | Ref.            |
|---------------------------|----------------------------------------------------|---------------------------------|-----------------|
| Co–Al LDH                 | KOH + K <sub>4</sub> Fe(CN) <sub>6</sub>           | 317 at 2 A/g                    | S1              |
|                           | KOH + K <sub>3</sub> Fe(CN) <sub>6</sub>           | 712 at 2 A /g                   | S1              |
| CuS                       | KOH + Na <sub>2</sub> S + S                        | 2175 at 15 A /g                 | S2              |
| Activated carbon          | H <sub>2</sub> SO <sub>4</sub> + KI                | 912 at 2 mA/cm <sup>2</sup>     | S3              |
|                           | H <sub>2</sub> SO <sub>4</sub> + KBr               | 572 at 2 mA/cm <sup>2</sup>     | S3              |
| Activated carbon          | H <sub>2</sub> SO <sub>4</sub> + VOSO <sub>4</sub> | 630.6 at 1 mA/cm <sup>2</sup>   | S4              |
| Activated carbon          | H <sub>2</sub> SO <sub>4</sub> + hydroquinone      | 901 at 2.65 mA/ cm <sup>2</sup> | S5              |
| Activated carbon          | H <sub>2</sub> SO <sub>4</sub> + hydroquinone      | 220 at 2.65 mA/cm <sup>2</sup>  | S6              |
| Polyaniline -<br>graphene | H <sub>2</sub> SO <sub>4</sub> + hydroquinone      | 553 at 1 A/g                    | S7              |
| MnO <sub>2</sub>          | KOH + p-phenylenediamine                           | 325.24 at 1 A/g                 | S8              |
| Activated carbon          | KOH + p-phenylenediamine                           | 605.22 at 1 A/g                 | S9              |
| SWCNT                     | KOH + p-phenylenediamine                           | 162.66 at 1 A/g                 | S10             |
| MWCNTs                    | KOH + m-phenylenediamine                           | 78 at 0.5 A/g                   | S11             |
| MWCNTs                    | H <sub>2</sub> SO <sub>4</sub> + indigo carmine    | 50 at 0.88 mA/cm <sup>2</sup>   | S12             |
| Activated carbon          | H <sub>2</sub> SO <sub>4</sub> + methylene blue    | 23 F/g                          | S13             |
| Activated carbon          | H <sub>2</sub> SO <sub>4</sub> + lignosulfonates   | 178 at 0.1 A/g                  | S14             |
| 3D graphene               | KOH + K <sub>3</sub> Fe(CN) <sub>6</sub>           | 1830 F/g at 2 A/g               | Present<br>work |
|                           |                                                    | 2091 F/g at 5 mV/s              |                 |



## Supplementary References

- S1. L. H. Su, X. G. Zhang; C. H. Mi, B. Gao and Y. Liu, *Chem. Phys.*, 2009, **11**, 2195.
- S2. L. Qian, X. Tian; L. Yang, H. Yuan and D. Xiao, *RSC Adv.*, 2013, **3**, 1703.
- S3. S. T. S. Kumar, R. K. Selvan, Y. S. Lee and J. S. Melo, *J. Mater. Chem.A*, 2013, **1**, 1086.
- S4. S. T. S. Kumar; R. K. Selvan; N. Ponpandian, J. S. Melo and Y. S. Lee, *J. Mater. Chem.A*, 2013, **1**, 7913.
- S5. S. Roldan, C. Blanco; M. Granda, R. Menendez and R. Santamaria, *Angew. Chem., Int. Ed.*, 2011, **50**, 1699.
- S6. S. Roldan, M. Granda; R. Menendez; R. Santamaria and C. Blanco, *J. Phys. Chem. C*, 2011, **115**, 17606.
- S7. W. Chen; R. B. Rakhi and H. N. Alshareef, *Nanoscale*, 2013, **5**, 4134.
- S8. Y. H. Jun; W. J. Huai; F. L. Qing, L. Y. Zhen; C. S. Hong, C. Yuan; W. J. Li, H. M. Liang, L. J. Ming; L. Zhang and H. Y. Fang, *Sci. China: Chem.*, 2012, **55**, 1319.
- S9. J. Wu, H. Yu; L. Fan, G. Luo; J. Lin and M. Huang, *J. Mater. Chem.*, 2012, **22**, 19025;
- S10. H. Yu; J. Wu, J. Lin; L. Fan, M. Huang; Y. Lin, Y. Li; F. Yu and Z. Qiu, *ChemPhysChem*, 2013, **14**, 394.
- S11. H. Yu, L. Fan, J. Wu, Y. Lin, M. Huang, J. Lin and Z. Lan, *RSC Adv.*, 2012, **2**, 6736.
- S12. S. Roldan, Z. Gonzalez, C. Blanco, M. Granda, R. Menendez and R. Santamaria, *Electrochimi. Acta*, 2011, **56**, 3401.
- S13. S. Roldan, M. Granda, R. Menendez, R. Santamaria and C. Blanco, *Electrochimi. Acta*, 2012, **83**, 241.
- S14. G. Lota and G. Milczarek, *Electrochem. Commun.*, 2011, **13**, 470.
